# Supplementary material
Source: Springer Nature journal article supplement (https://www.springermedizin.de/resource/supplementary/12943_2005_141_MOESM3_ESM.pdf/9553684)
Supplement: MOESM3 [file 9553684]

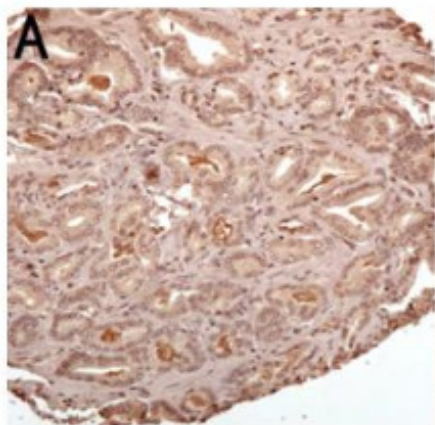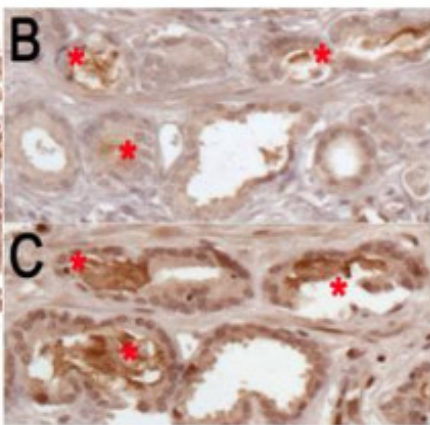

**D**

| Sample Co-localization    | number of samples | mean % of Ki-67 positivity | Two-tailed ANOVA |
|---------------------------|-------------------|----------------------------|------------------|
| PERLECAN and SHH positive | 58                | 7.620690                   | <b>p=0.0376</b>  |
| PERLECAN and SHH negative | 270               | 5.283582                   |                  |
